# Supplementary material
Source: Springer Nature journal article supplement (https://www.springermedizin.de/resource/supplementary/12883_2013_787_MOESM2_ESM.pdf/9456268)
Supplement: MOESM2 [file 9456268]

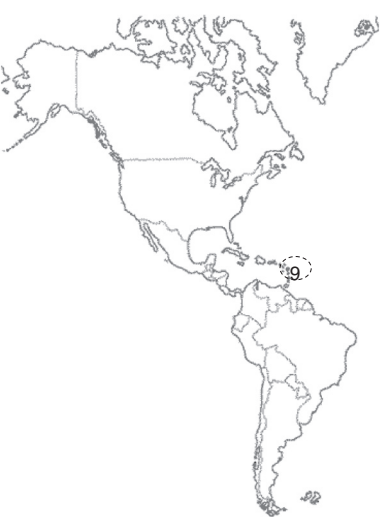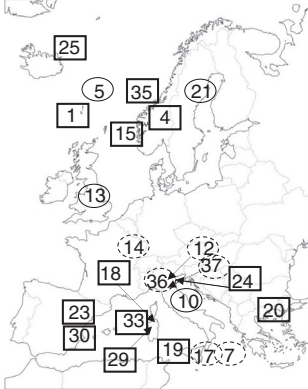

□ = Trends

○ = Age and sex patterns

○ (dashed) = Both

- 1-Faroe Islands, Joensen 2011.
- 4-Oppland, Risberg 2011.
- 5-Faroe Islands, Joensen 2010
- 7-Catania, Nicoletti 2011.
- 9-French West Indies, Cabre 2009.
- 10-San Marino, Granieri 2008.
- 12-Ferrara, Granieri 2007.
- 13-United Kingdom, Alonso 2007.

- 14-Lorraine, Debouverie 2007.
- 15-Hordaland, Grytten 2006.
- 17-Catania, Nicoletti 2005.
- 18-Sassari, Pugliatti 2005 .
- 19-Monreale, Ragonese 2004.
- 20-Evros, Piperidou 2003.
- 21-Västerbotten, Sundström 2003.
- 23-Lower Aragon, Modrego 2003.

- 24-Padova, Ranzato 2003.
- 25-Iceland, Benedikz 2002.
- 29-Nuoro, Granieri 2000 .
- 30-Alcoi, Mallada 2000.
- 33-NW Sardinia, Rosati 1996.
- 35-More & Romsdal, Midgard 1996.
- 36-Reggio Emilia & Modena, Guidetti 1995.
- 37-Modena, Cavalletti 1994.
